# Supplementary material for: The Concurrent Programming of Saccades
Source: PLoS One. 2016 Dec 22;11(12):e0168724. doi: 10.1371/journal.pone.0168724 (PMC5179120; doi:10.1371/journal.pone.0168724)
Supplement: S1 Table — (XLSX) [file pone.0168724.s001.xlsx]

## Sheet: VR data
FIGURE 3 Overall Latencies						FIGURE 5 Latencies
VR						VR		Effect of Dir		Effect of Dist
							None	Small Dir	Large Dir	Large In	Small In	Small Out	Large Out
Ppt	First Only	Second Only	First of 2-step	Second of 2-step			0	10	20	-1.5	-0.75	0.75	1.5
1	404	518	349.143	268		1	264	284	280	252	324	238	234
2	412	404	362.286	215.143		2	188	220	236	228	220	210	204
3	488	280	310.571	183.714		3	192	220	160	188	160	192	174
4	696	676	762.857	241.429		4	248	264	226	244	272	232	204
5	486	284	292.571	278		5	292	212	310	312	312	304	204
6	380	708	394.857	250.286		6	216	224	252	260	280	296	224
7	374	756	320	237.429		7	244	214	226	260	236	232	250
8	352	334	323.143	284.857		8	310	234	282	278	286	332	272
9	380	352	344.286	230.857		9	220	204	216	202	190	256	328
10	396	440	319.143	198.286		10	192	220	204	172	236	180	184
FIGURE 4 First Saccade Accuracy
VR
ANGLE						FIGURE 5 Amplitude
	First Only	First of two step				VR	-1.5	-0.75	0	0.75	1.5
1	-3.23167	6.15939				1	-0.704539	0.536607	-0.717713	-0.296464	-0.0421463
2	-2.7825	-1.34231				2	-0.914736	0.878922	1.62451	0.216717	0.411256
3	-1.57143	4.57124				3	0.644511	-0.0729234	1.12978	-0.0574784	-0.0306727
4	2.198	-0.14388				4	-1.48776	-0.944116	-2.31084	0.788594	-2.31276
5	-2.04125	0.739919				5	-1.10856	0.274738	-0.576385	0.36115	-0.0573116
6	-0.336667	-3.57626				6	0.79573	0.553274	-0.979989	-0.222555	0.525756
7	-2.265	-1.21315				7	0.974284	0.870422	0.0287111	0.724443	0.145615
8	-3.98125	-0.124381				8	-0.0868304	-0.0350852	0.799735	-0.364639	1.26494
9	-3.94571	3.20529				9	-2.00254	-1.0309	-1.01038	-0.638647	-0.655596
10	-1.03286	1.1748				10	0.393019	-0.0265283	-0.026774	-0.0127728	-0.673066
						Figure 5 Direction
AMPLITUDE							0	10	20
	First Only	First of two step				1	-5.71458	-5.77493	19.0628
1	1.77655	0.777683				2	-15.0795	2.7641	13.0483
2	-0.0344889	-0.371305				3	0.271444	12.2235	31.7739
3	1.71584	0.463394				4	5.07047	-9.08199	8.7635
4	0.982813	-0.277474				5	-3.89865	14.0591	14.2209
5	0.673466	0.228507				6	27.1062	12.7748	14.9273
6	-2.17345	0.0464106				7	-3.61274	11.2631	23.3779
7	0.119268	-0.210885				8	-6.31829	7.59523	3.9067
8	-0.182543	-0.322986				9	-12.3456	11.4055	8.61441
9	-1.2431	-1.03797				10	-28.2705	20.6339	13.5766
10	0.235411	-0.407695

## Sheet: RV data
RV
						FIGURE 5 Latencies		Effect of Dir		Effect of Dist
FIGURE 3 Overall Latencies							None	Small Dir	Large Dir	Large In	Small In	Small Out	Large Out
Ppt	First Only	Second Only	First of 2-step	Second of 2-step			0	10	20	-1.5	-0.75	0.75	1.5
1	290	416	279.429	282.857		1	274	280	272	232	312	312	298
2	670	524	370.571	289.429		2	266	248	274	252	290	320	376
3	274	376	289.714	208.857		3	204	198	196	238	228	194	204
4	526	496	426.857	251.143		4	228	242	216	218	266	334	254
5	294	552	280	272		5	282	272	274	296	262	232	286
6	348	368	333.143	263.143		6	230	260	272	224	264	250	342
7	596	414	336.286	270.286		7	246	278	308	228	264	284	284
8	372	372	316	276		8	272	286	262	252	294	290	276
9	312	530	327.429	193.714		9	238	182	180	202	168	204	182
10	272	500	270.857	270.571		10	330	262	280	268	228	282	244
FIGURE 4 First Saccade Accuracy
ANGLE						FIGURE 5 Amplitude
	First Only	First of two step					-1.5	-0.75	0	0.75	1.5
1	-0.82875	-0.208827				1	-2.06439	-1.16801	-2.04591	-0.491691	-1.3491
2	-2.10125	-1.59152				2	-0.524047	0.740759	0.0191538	0.828295	0.574704
3	0.526667	-1.22089				3	-0.769775	-1.0195	-0.515523	0.575058	-0.114967
4	-1.15625	1.06361				4	-1.81186	-2.39043	-2.64221	-1.81869	-1.12957
5	0.89125	0.941441				5	-1.47042	-1.34205	-0.261986	-0.738542	-0.714426
6	-3.48429	-1.27689				6	-1.47444	-1.82667	-0.908251	-0.187744	-0.489137
7	2.0825	-0.266764				7	-1.3898	-1.8369	-1.00684	-0.31559	-1.04348
8	2.54	-0.472153				8	-2.94096	-2.27278	-1.41859	-1.81361	-2.12974
9	0.587143	2.07765				9	-2.67521	-3.16005	-1.01808	-1.90139	-3.38889
10	-2.12125	-0.793214				10	-3.13246	-2.72173	-1.31286	-1.36081	-2.0399
						Figure 5 Direction
AMPLITUDE							0	10	20
	First Only	First of two step				1	-21.3238	15.3605	19.1064
1	0.420887	0.296211				2	-16.7818	16.9019	13.4685
2	0.0612458	-0.217025				3	-0.648588	4.95357	6.33381
3	0.624941	0.855544				4	31.9702	-2.87654	19.5035
4	0.394923	0.653537				5	-9.04844	9.56516	17.7046
5	0.143628	0.231616				6	5.12965	6.90687	18.935
6	1.00228	0.908215				7	-6.98843	8.35396	21.6093
7	-0.395497	-0.74738				8	4.9262	2.16545	9.21406
8	-0.693209	-0.0635496				9	13.236	11.7733	-7.47931
9	0.629898	0.0227444				10	17.3536	1.20347	21.9453
10	-0.726181	-0.2246
